# Supplementary material
Source: PubMed Central journal article supplement (PMC5443610)
Supplement: jm7b00306_si_001.pdf [file jm7b00306_si_001.pdf]

## Supporting Information

### Benzo-isoquinoline-diones as Potent and Selective Inhibitors of BRPF2 and TAF1/TAF1L Bromodomains

Léa Bouché,<sup>\*,†</sup> Clara D. Christ,<sup>†</sup> Stephan Siegel,<sup>†</sup> Amaury E. Fernández-Montalván,<sup>†</sup> Simon J. Holton,<sup>†</sup> Oleg Fedorov,<sup>‡,§</sup> Antonius ter Laak,<sup>†</sup> Tatsuo Sugawara,<sup>†</sup> Detlef Stöckigt,<sup>†</sup> Cynthia Tallant,<sup>‡,§</sup> James Bennett,<sup>‡,§</sup> Octovia Monteiro,<sup>‡,§</sup> Laura Díaz-Sáez,<sup>‡,§</sup> Paulina Siejka,<sup>‡,§</sup> Julia Meier,<sup>‡,||</sup> Vera Pütter,<sup>†</sup> Jörg Weiske,<sup>†</sup> Susanne Müller,<sup>‡,§</sup> Kilian V. M. Huber,<sup>‡,§</sup> Ingo V. Hartung,<sup>†</sup> and Bernard Haendler<sup>†</sup>

<sup>†</sup>Drug Discovery, Bayer AG, Müllerstrasse 178, 13353 Berlin, Germany

<sup>‡</sup>Structural Genomics Consortium, Nuffield Department of Clinical Medicine, University of Oxford, Old Road Campus Research Building, Roosevelt Drive, Oxford OX3 7DQ, U.K.

<sup>§</sup>Target Discovery Institute, Nuffield Department of Clinical Medicine, University of Oxford, Roosevelt Drive, Oxford OX3 7FZ, U.K.

<sup>||</sup>Present address: Merck KGaA, Frankfurter Strasse 250, 64293 Darmstadt, Germany

\*Corresponding author: [lea.bouche@bayer.com](mailto:lea.bouche@bayer.com)

## Table of Contents

- 1. Figure S1.** Binding mode of **5** in TAF1 BD2. (A) Superposition of the BRPF2 BD-**7** complex structure (depicted as in Figure 3, with the protein molecular surface rendered in gray) with the binding mode of **5** in TAF1 BD2 (C, N and O atoms colored cyan, blue and red, respectively). The relative atomic densities suggested a nearly 50:50 ratio between the two atropisomers with partial occupancy of the propanol at 6' position. (B, C) Compounds **5** and **7** representative model-phased 2F obs – F calc· $\alpha$ calc electron densities contoured at 0.2 e  $\text{\AA}^{-3}$  are shown in light blue.
- 2. Table S1.** Cellular activity of **7**, **8** and **13** in NanoBRET™ assay.
- 3. Table S2.** TSA results for **13** in a panel of 48 BDs.
- 4. Table S3.** Molecular properties and physicochemical profile of **5**.
- 5. Table S4.** BD selectivity profile of **5**.
- 6. Table S5.** Anti-proliferative activity of **5**.
- 7. Table S6.** Crystallographic data for **7** in BRPF2 BD and **5** in TAF1 BD2: data collection and refinement statistics.

# 1. Figure S1

Binding mode of **5** in TAF1 BD2

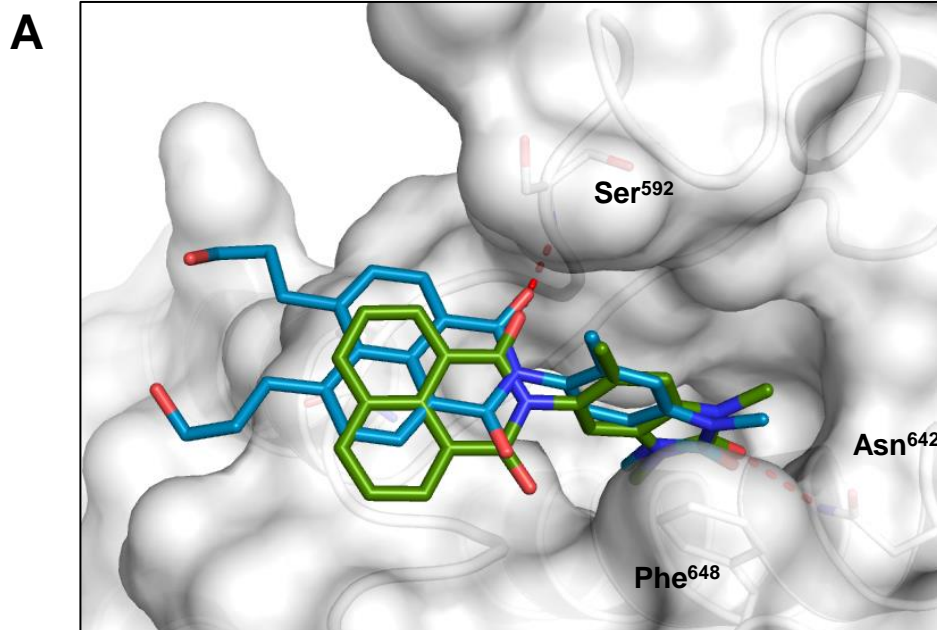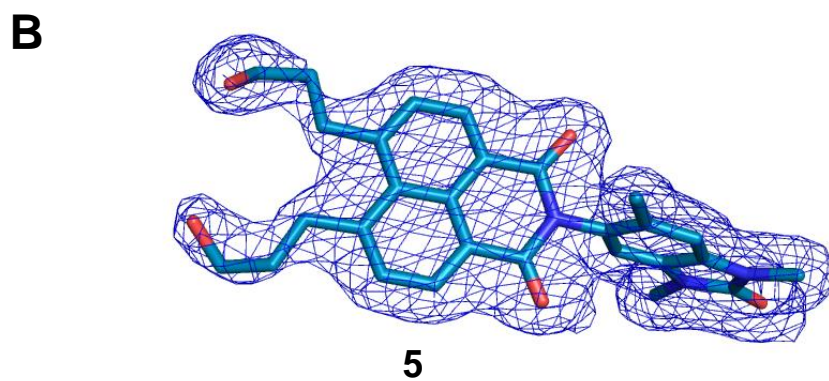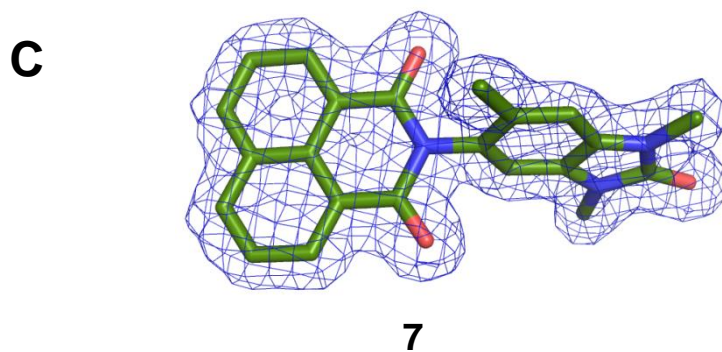

## 2. Table S1

Cellular activity of **7**, **8** and **13** in NanoBRET™ assay

|                                                  | Compound 7                                                                        | Compound 8                                                                        | Compound 13                                                                        |
|--------------------------------------------------|-----------------------------------------------------------------------------------|-----------------------------------------------------------------------------------|------------------------------------------------------------------------------------|
|                                                  | 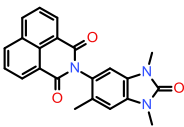 |  |  |
| <b>BRPF2 BD IC<sub>50</sub> [nM]</b>             | 470                                                                               | 1500                                                                              | 675                                                                                |
| <b>BRPF1 BD IC<sub>50</sub> [nM]</b>             | >10000                                                                            | >10000                                                                            | >10000                                                                             |
| <b>TAF1 BD2 cellular inhibition at 10 μM [%]</b> | 55                                                                                | n.a.                                                                              | 35                                                                                 |

*n.a.* = not available

### 3. Table S2

TSA results for **13** in a panel of 48 BDs

| Compound 13<br>10 $\mu$ M |                 |
|---------------------------|-----------------|
| protein                   | $\Delta$ Tm [K] |
| ASH1L                     | 1.2             |
| ATAD2                     | 0.0             |
| BAZ1A                     | -1.0            |
| BAZ1B                     | -1.0            |
| BAZ2A                     | 0.0             |
| BAZ2B                     | 0.6             |
| BRPF2                     | 6.2             |
| BRD2 BD1                  | 0.3             |
| BRD2 BD2                  | 0.4             |
| BRD3 BD1                  | -0.3            |
| BRD3 BD2                  | 0.1             |
| BRD4 BD1                  | 0.8             |
| BRD4 BD2                  | 1.3             |
| BRD7                      | 2.3             |
| BRD9                      | -2.9            |
| BRDT BD1                  | -1.0            |
| BRDT BD2                  | -1.0            |
| BRPF1A                    | -0.4            |
| BRPF1B                    | 1.3             |
| BRPF3                     | 1.1             |
| BRWD3 BD2                 | -0.5            |
| CECR2                     | 3.5             |
| CREBBP                    | 1.3             |
| EP300                     | 3.5             |
| FALZ                      | 0.0             |
| GCN5L2                    | -0.4            |
| ATAD2B                    | 0.2             |
| SP140L                    | -1.4            |
| MLL                       | -1.2            |
| PB1 BD1                   | -1.1            |
| PB1 BD2                   | -1.0            |
| PB1 BD3                   | 0.2             |
| PB1 BD4                   | -0.3            |
| PB1 BD5                   | -0.1            |
| PB1 BD6                   | -0.7            |
| PCAF                      | 0.5             |
| PHIP BD2                  | -2.4            |
| SMARCA2                   | 0.5             |
| SMARCA4                   | 0.0             |
| SP140                     | -0.9            |
| TAF1 BD2                  | 2.2             |
| TAF1 BD1                  | 0.3             |
| TAF1L BD1                 | -0.2            |
| TAF1L BD2                 | 1.6             |
| TIF1-bromo                | -1.2            |
| TIF1-phd-bromo            | 0.1             |
| TRIM28                    | 0.3             |
| WDR9 BD2                  | -1.4            |

#### 4. Table S3

### Molecular properties and physicochemical profile of 5

|                                                            | Compound 5      |
|------------------------------------------------------------|-----------------|
| MW [g/mol <sup>-1</sup> ]                                  | 429             |
| TPSA [Å <sup>2</sup> ]                                     | 81              |
| logD (pH = 7.5)                                            | 2.0             |
| Solubility from solid pH = 6.5 [mg/L]                      | 10              |
| Solubility PEG400/EtOH/H <sub>2</sub> O = 60/10/30 [mg/L]  | 2262            |
| Solubility Solutol/EtOH/H <sub>2</sub> O = 40/10/70 [mg/L] | 1630            |
| BEI / LLE BRPF2                                            | 16.72 / 4.72    |
| BEI / LLE TAF1                                             | 18.86 / 5.65    |
| Plasma stability after 4 h: human / rat [%]                | 100 / 100       |
| Chemical stability after 24 h: pH = 1 / 7 / 10 [%]         | 100 / 100 / 100 |

## 5. Table S4

### BD selectivity profile of 5

|                 | Compound 5  |              |
|-----------------|-------------|--------------|
| target          | % at 100 nM | % at 1000 nM |
| ATAD2A          | 93          | 87           |
| ATAD2B          | 73          | 59           |
| BAZ2A           | 53          | 41           |
| BAZ2B           | 68          | 14           |
| BRPF2           | 0           | 0            |
| BRD2 BD1        | 75          | 15           |
| BRD2 BD2        | 72          | 74           |
| BRD3 BD1        | 96          | 71           |
| BRD3 BD2        | 91          | 89           |
| BRD4 BD1        | 82          | 71           |
| BRD4 BD2        | 70          | 14           |
| BRD7            | 68          | 18           |
| BRD9            | 87          | 75           |
| BRDT(1)         | 93          | 91           |
| BRDT(2)         | 79          | 8.8          |
| BRPF1           | 97          | 25           |
| CECR2           | 74          | 15           |
| CREBBP          | 30          | 0            |
| EP300           | 41          | 0.5          |
| FALZ            | 72          | 37           |
| GCN5L BD2       | 100         | 69           |
| PBRM1 BD2       | 74          | 70           |
| PBRM1 BD5       | 81          | 70           |
| PCAF            | 88          | 71           |
| SMARCA2         | 73          | 56           |
| SMARCA4         | 100         | 100          |
| TAF1 BD2        | 0.8         | 0.2          |
| TAF1L BD2       | 0.7         | 0            |
| TRIM24 (PHD,BD) | 81          | 78           |
| TRIM33 (PHD,BD) | 92          | 96           |
| WDR9 BD2        | 61          | 50           |

## 6. Table S5

### Anti-proliferative activity of 5

| Cell line  | Origin                     | GI <sub>50</sub> [nM] |
|------------|----------------------------|-----------------------|
| MOLM-13    | Acute monocytic leukemia   | 1060                  |
| MV4-11     | Myelomonocytic leukemia    | 2630                  |
| 769-P      | Renal cell adenocarcinoma  | 3210                  |
| Jurkat     | Acute T cell leukemia      | 3900                  |
| NCI-H526   | Small cell lung cancer     | 6860                  |
| CHL-1      | Melanoma                   | 7400                  |
| 5637       | Urinary bladder            | 7980                  |
| MDA-MB-231 | Breast adenocarcinoma      | >10000                |
| MDA-MB-453 | Breast carcinoma           | >10000                |
| NCI-H1299  | Non-small cell lung cancer | >10000                |
| SW-403     | Colorectal adenocarcinoma  | >10000                |
| SW-480     | Colorectal adenocarcinoma  | >10000                |



## 7. Table S6

Crystallographic data for **7** in BRPF2 BD and **5** in TAF1 BD2: data collection and refinement statistics

|                                                         | <b>BRPF2 BD-<br/>Compound 7</b><br>(PDB code 5N49) | <b>TAF1 BD2-<br/>Compound 5</b><br>(PDB code 5MG2) |
|---------------------------------------------------------|----------------------------------------------------|----------------------------------------------------|
| <b>Data Collection</b>                                  |                                                    |                                                    |
| Space group (no.)                                       | P2 <sub>1</sub> 2 <sub>1</sub> 2 <sub>1</sub>      | P3 <sub>1</sub> 21                                 |
| Unit cell parameters,<br>a, b, c [Å],                   | 56.6, 56.9, 102.3                                  | 64.7, 64.7, 101.1                                  |
| Resolution limit [Å]                                    | 38.00-1.90 (2.03-1.94)                             | 101.08-1.75 (1.85-1.75)                            |
| No. of reflections                                      | 96508                                              | 24216                                              |
| No. of uniques                                          | 26623                                              | 3618                                               |
| Multiplicity                                            | 3.6 (3.7)                                          | 7.4 (7.8)                                          |
| I/sigI                                                  | 13.0 (2.4)                                         | 17.3 (2.80)                                        |
| R_meas [%]                                              | 5.7 (50.4)                                         | 6.1 (69.3)                                         |
| Completeness [%]                                        | 99.6 (99.6)                                        | 96.3 (100)                                         |
| <b>Refinement</b>                                       |                                                    |                                                    |
| Resolution limit [Å]                                    | 38.00-1.94 (2.03-1.94)                             | 56.07-1.75 (1.85-1.75)                             |
| R (work) / R(free) [%]                                  | 18.1 /21.9                                         | 18.6 /22.0                                         |
| Mean B value [Å <sup>2</sup> ]<br>(protein/other/water) | 28.8/22.8/35.3                                     | 41.8 / 34.5 / 47.4                                 |
| RMSD bond length [Å]                                    | 0.017                                              | 0.010                                              |
| RMSD bond angles [deg]                                  | 1.990                                              | 1.277                                              |
| Ramachandran:                                           |                                                    |                                                    |
| Favored [%]                                             | 98.7                                               | 100                                                |
| Allowed [%]                                             | 1.3                                                | 0                                                  |
| Disallowed [%]                                          | 0                                                  | 0                                                  |

\* Values in parentheses correspond to the highest resolution shell.
